# Supplementary material
Source: PubMed Central journal article supplement (PMC3279994)

**Supplemental Figure 1: *HIF-1* expression in WT mice**

Immunohistochemistry for HIF-1 $\alpha$  in WT kidney (magnification from corticomedullary junction). Original magnification,  $\times 400$ .

**Supplemental Figure 2: *Fibrosis markers in WT and *Vhl* knockout mice.***

(A) Semiquantitative analysis of Sirius Red staining in kidneys of 3 (n=14 each) and 18 (n=8 each) months old WT (Cre $^{-}$ ) and *Vhl* deficient mice (Cre $^{+}$ ).

(B) Real-time PCR analyses of profibrotic genes *Col1a2*, *Tgf $\beta$ 1*, and *Fsp1* in kidneys of WT (Cre $^{-}$ ; n=5 each) and *Vhl* knockout mice (Cre $^{+}$ ; n=6 each) at the age of 3 and 18 months.

**Supplemental Figure 3: *Angiogenesis in WT and *Vhl* knockout mice.***

(A) Semiquantitative analysis of CD34 immunostained peritubular endothelial area in different kidney regions of 13 week-old WT (Cre $^{-}$ ; n=5) and *Vhl* knockout mice (Cre $^{+}$ ; n=5) using image analyzing software.

(B) Relative *Vegfa* expression in microdissected proximal convoluted tubules (PCT) and TALs of WT (Cre $^{-}$ ; n=4) and *Vhl* deficient mice (Cre $^{+}$ ; n=7) analyzed by real-time PCR. \*,  $P < 0.05$ , Cre $^{-}$  versus Cre $^{+}$ .

**Supplemental Figure 4: *Nephron specific mRNA markers in microdissected tubules.***

Detection of *Sglt2*, *Npt2a* expression in microdissected proximal convoluted tubules (PCT; n=4) and *Nkcc2*, *Thp* in microdissected thick ascending limbs (TAL; n=4) by real-time PCR. \*,  $P < 0.05$ , PCT versus TAL.

**Supplemental Table 1: PCR primer sequences**

| <b>Gene</b> | <b>Forward primer (5'-3')</b> | <b>Reverse primer (5'-3')</b> | <b>Gene bank code</b> |
|-------------|-------------------------------|-------------------------------|-----------------------|
| Col1a2      | GTAAACACCCCAGCGAAGAACT        | TCAAACCTGGCTGCCACCAT          | NM_007743.2           |
| Cre         | GTGCAAGCTGAACAACAGGA          | CCAGCATCCACATTCTCCTT          | AY056050.1            |
| Epo         | CATCTGCGACAGTCGAGTTCTG        | CACAACCCATCGTGACATTTTC        | NM_007942.2           |
| Fsp1        | AGGGCTGCCAGATAAGGA            | CTGGCAAACCTACACCCCAACA        | NM_011311.2           |
| Glut1       | GCTGTGCTTATGGGCTTCTC          | GACGACACTGAGCAGCAGAG          | NM_011400.3           |
| Il1b        | CCCCAGGGCATGTTAAGGA           | TGTGACCCTGAGCGACCTG           | NM_008361.3           |
| Il6         | CTTCTACCCCAATTTCCAATG         | ATTGGATGGTCTTGGTCCTTAGC       | NM_031168.1           |
| Kim1        | TGGTTGCCTTCCGTGTCTCT          | TCTTCAGCTCGGGAATGCA           | NM_134248.2           |
| Ldha        | GTTACACATCCTGGGCCATTG         | GCACCCGCCTAAGGTTCTTC          | NM_010699.2           |
| Mcp1        | CTGCCCTAAGGTCTTCAGCA          | GCATCACAGTCCGAGTCACA          | NM_011333.3           |
| Ngal        | GGCCTCAAGGACGACAACA           | TCACCACCCATTCAAGTTGTCA        | NM_008491.1           |
| Nkcc2       | TCGTGGAGGTGGAGCCTACT          | AGCCTATTGACCCACCGAACT         | NM_183354.2           |
| Npt2a       | GCCTTTGTGGTGCTTGTTAATG        | CGAGGTAGGAAGTCCCATGTCT        | NM_011392.2           |
| Pdk1        | ATCTCATCGAAAGCACATTGGA        | CCGCCTAGCGTTCTCATAGC          | NM_172665.4           |
| Pgk1        | CTGTGGTACTGAGAGCAGCAAGA       | CAGGACCATTCCAAACAATCTG        | NM_008828.2           |
| Rn18s       | TTGATTAAGTCCCTGCCCTTTGT       | CGATCCGAGGGCCTCACTA           | NR_003278.1           |
| Sglt2       | TGTTGGACCCTCACAAAGAGTAAG      | GCTGTATTCTTGCCCTGTTCTT        | NM_133254.3           |
| Tgfb1       | GAAACGGAAGCGCATCGA            | GGGACTGGCGAGCCTTAGTT          | NM_011577.1           |
| Thp         | CTTGCCAGGTGGCTTCTATAT         | GATCGGTGCAGTAAGCCAGATT        | NM_009470.4           |
| Thp-Cre     | TGGCTCCTTGGGCTTAGGTCTAC       | CTAGAGCCTGTTTTGCACGTTT        |                       |
| Tnfa        | CTAGTGGTGCCAGCCGATG           | TAGTCGGGGCAGCCTTGTC           | NM_013693.2           |

**Supplemental Figure 1**

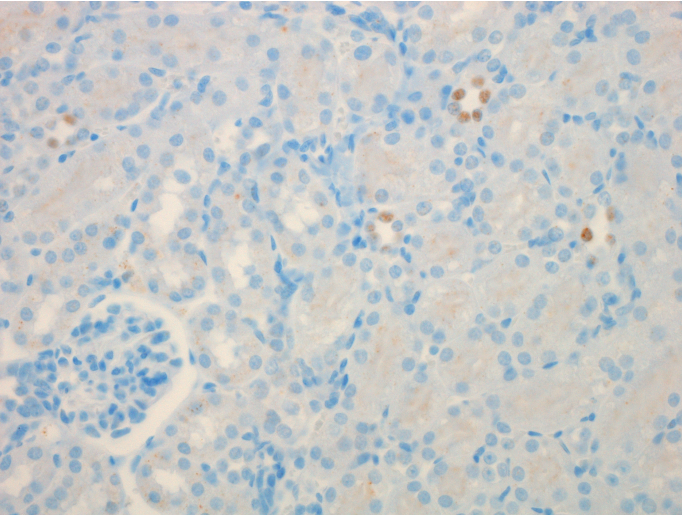

## Supplemental Figure 2

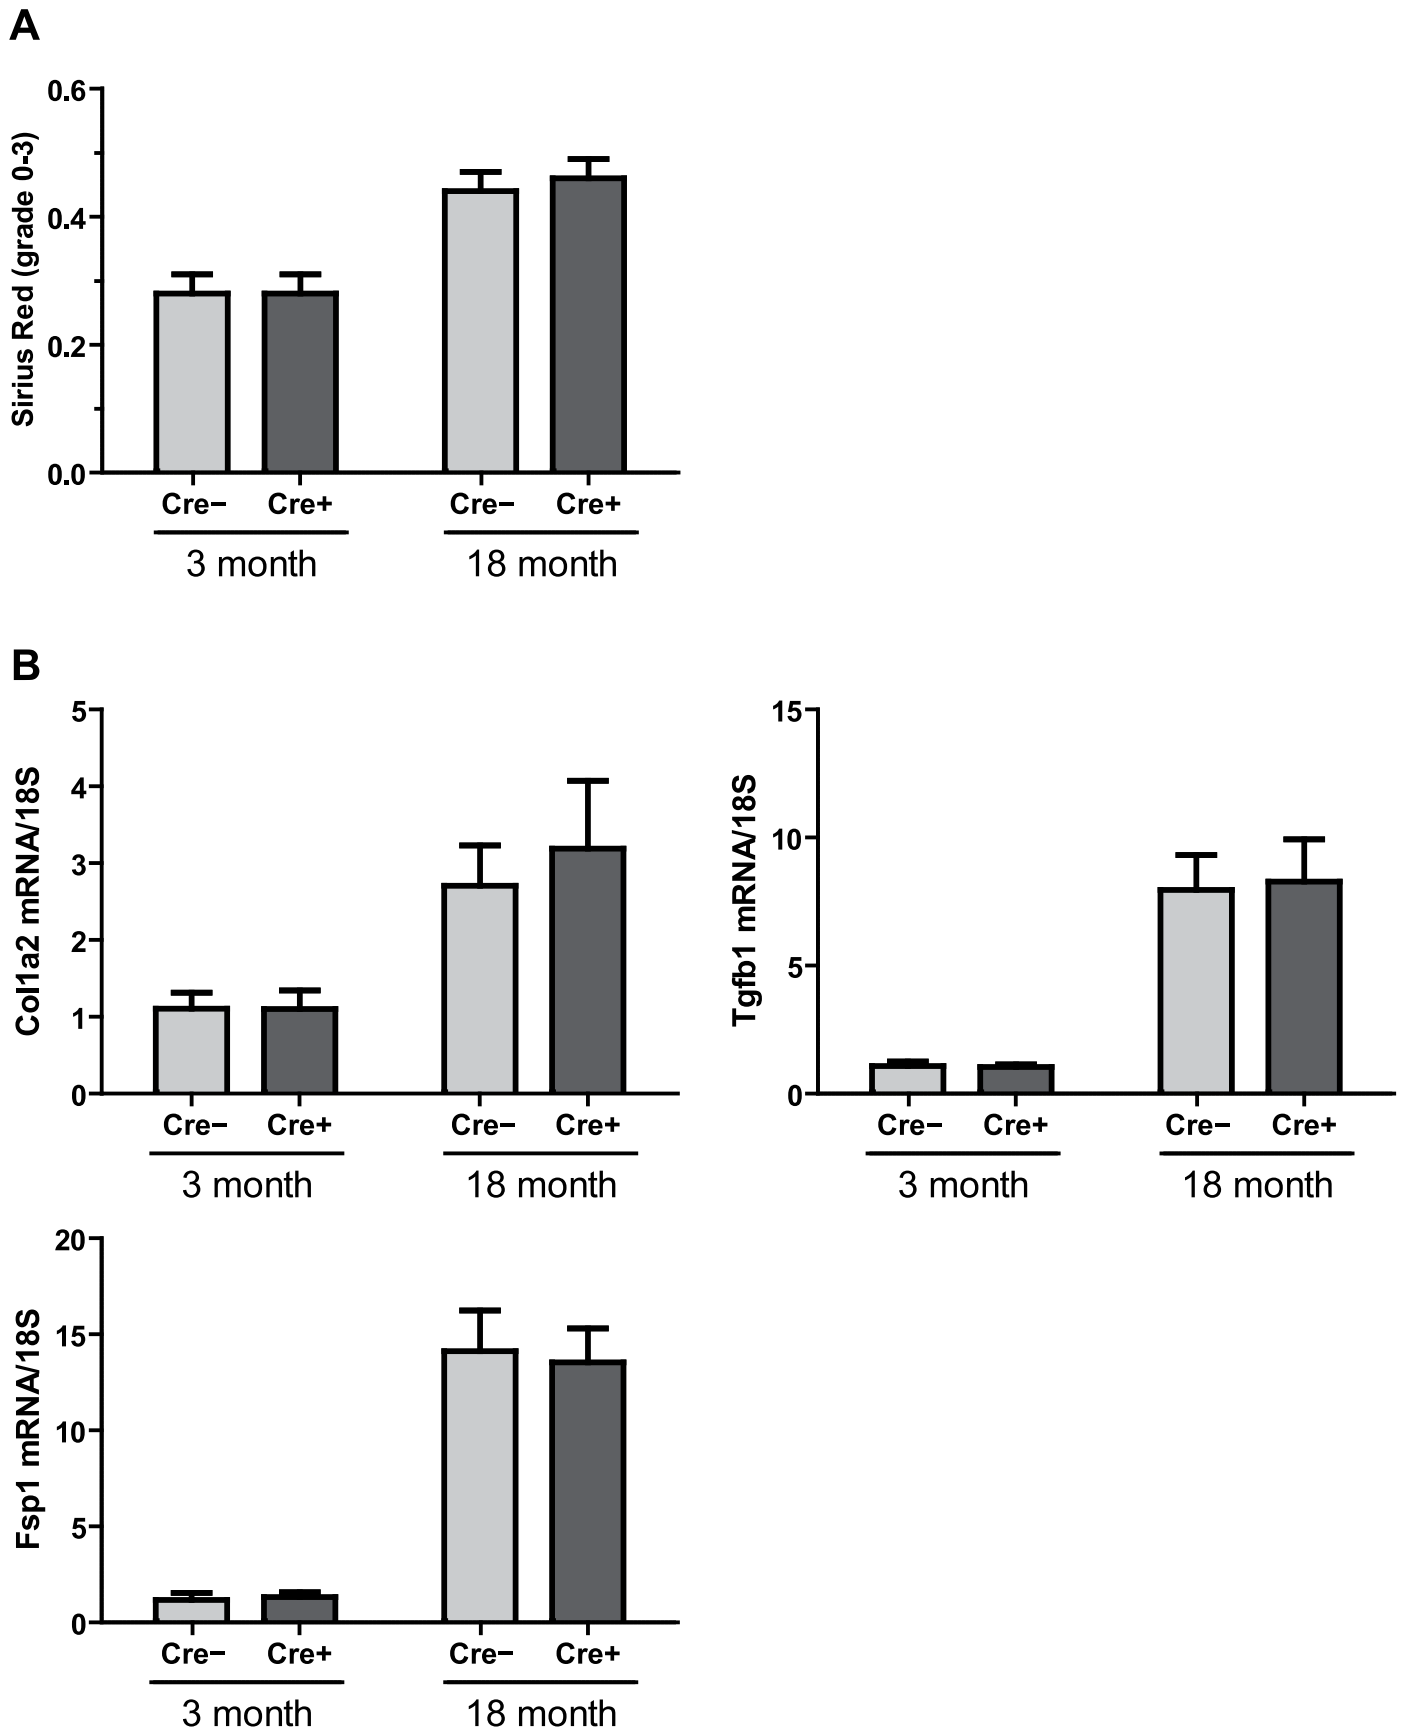

### Supplemental Figure 3

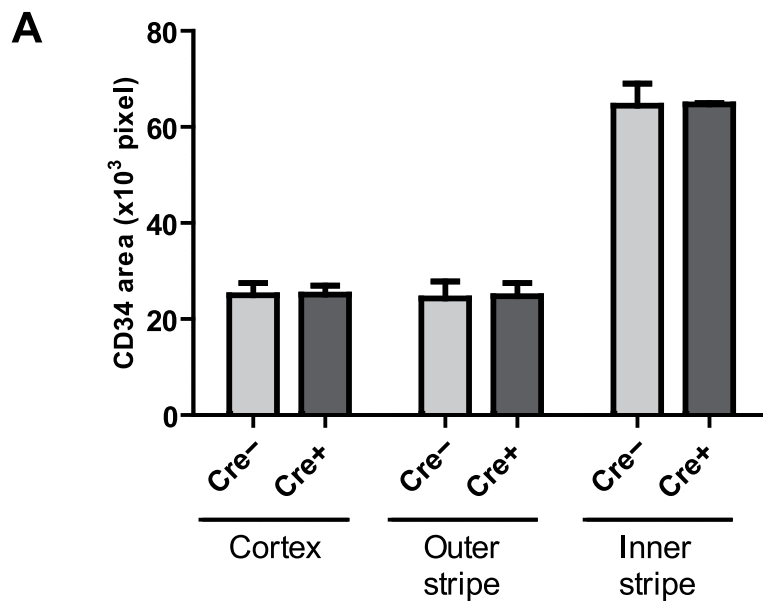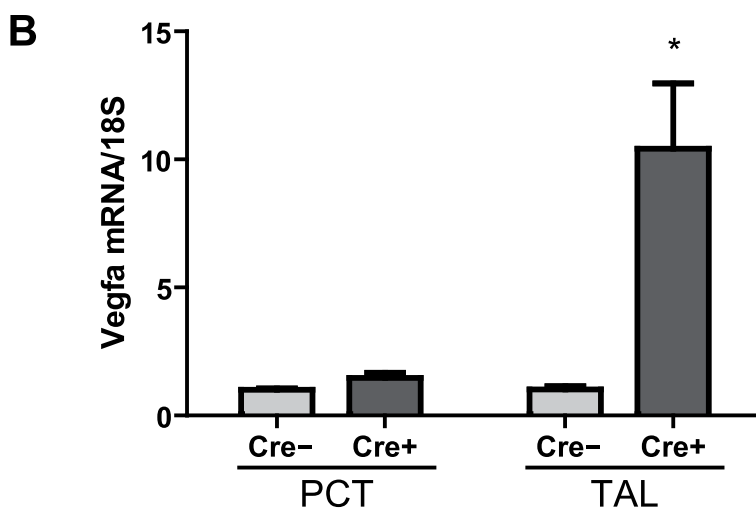

# Supplemental Figure 4

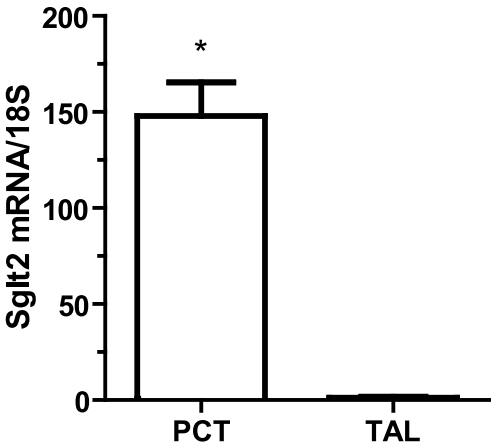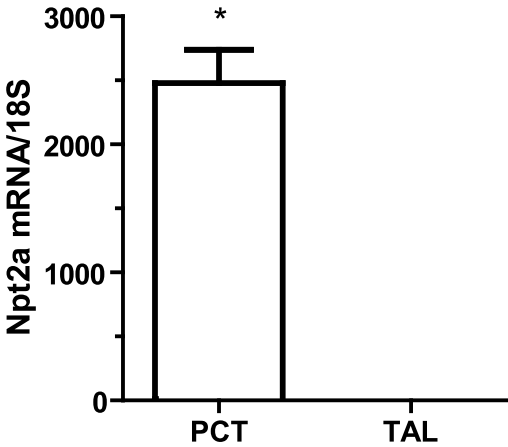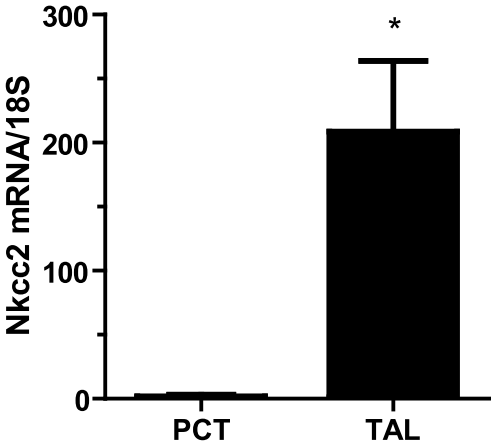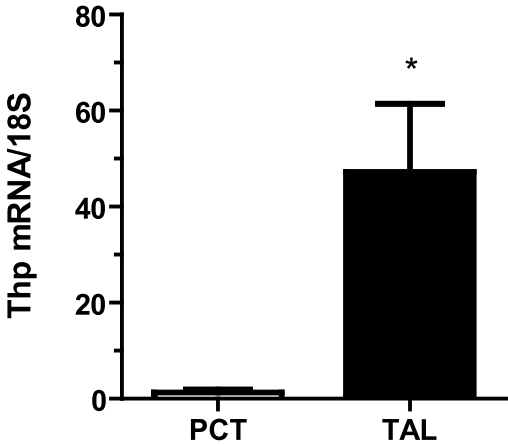

Supplement: supp_ASN.2010121249_supplement.pdf [file supp_ASN.2010121249_supplement.pdf]
